# Supplementary material for: Fine mapping of a male sterility gene ms-3 in a novel cucumber (Cucumis sativus L.) mutant
Source: PubMed Central journal article supplement (PMC5787221; doi:10.1007/s00122-017-3013-2), 2017-11-13
Supplement: 122_2017_3013_MOESM1_ESM.pdf [file 122_2017_3013_MOESM1_ESM.pdf]

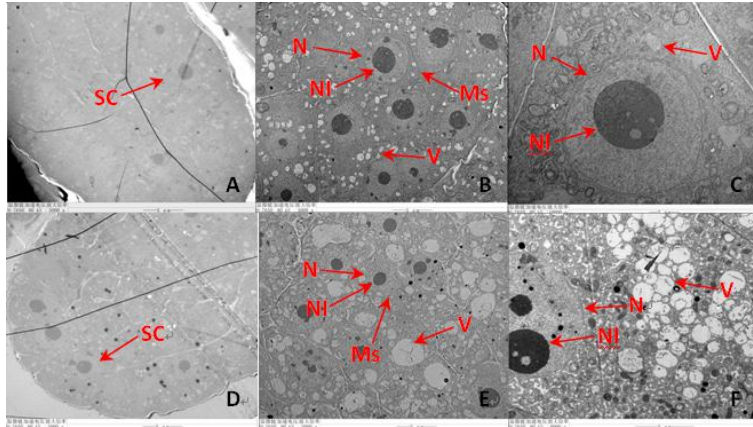

Fig\_S1\_ Transmission electron microscopy (TEM) images of male sterile and fertile anthers. (A) Sporogenous cells of a male fertile anther,  $\times 5000$ ; (B) microsporocyte of a male fertile anther at an early stage,  $\times 5000$ ; (C) microsporocyte of male fertile anther,  $\times 10000$ ; (D) Sporogenous cells of a sterile anther,  $\times 5000$ ; (E) microsporocyte of a sterile anther at an early stage,  $\times 5000$ ; (F) microsporocyte of a sterile anther,  $\times 8000$ . SC: sporogenous cell; N: nucleus; NI: nucleoli; V: vacuoles; Ms, microsporocyte.
