# Supplementary material for: Fine mapping of a male sterility gene ms-3 in a novel cucumber (Cucumis sativus L.) mutant
Source: PubMed Central journal article supplement (PMC5787221; doi:10.1007/s00122-017-3013-2), 2017-11-13
Supplement: 122_2017_3013_MOESM2_ESM.pdf [file 122_2017_3013_MOESM2_ESM.pdf]

Fig S2. Alignment of *Csa3M006660* sequences from WT and *ms-3*  
 (Yellow highlight=exons; Red highlight=SNP)

```

WT. seq      CAAAACCTCCAAATCCAAATATGAAACTACCAAAATTCAGTGAATGGTAGAGAAAGAAGA
ms-3. seq    CAAAACCTCCAAATCCAAATATGAAACTACCAAAATTCAGTGAATGGTAGAGAAAGAAGA
*****

WT. seq      AGAAGAAGAAGATGAAGAAATGAAGTTCATCTCAGCCATGTCGATTTGATTCTGGAAT
ms-3. seq    AGAAGAAGAAGATGAAGAAATGAAGTTCATCTCAGCCATGTCGATTTGATTCTGGAAT
*****

WT. seq      CCTGCAAGAAGAGAAAAAGAAGGCCTAAACTTTTCGGGTTTCAAACGTTGCGGGATCCTG
ms-3. seq    CCTGCAAGAAGAGAAAAAGAAGGCCTAAACTTTTCGGGTTTCAAACGTTGCGGGATCCTG
*****

WT. seq      GATCGCCAATCAACCCACGGGTCCATTTTCGTGAGAATATCAGAATCTTCTTCAACAAT
ms-3. seq    GATCGCCAATCAACCCACGGGTCCATTTTCGTGAGAATATCAGAATCTTCTTCAACAAT
*****

WT. seq      GTGCAGAGATTGAAGATTACAGAATCAAGAAATGCCTATATGGTGTACTCTCCTTGTT
ms-3. seq    GTGCAGAGATTGAAGATTACAGAATCAAGAAATGCCTATATGGTGTACTCTCCTTGTT
*****

WT. seq      ATGAAAATAAAAGCTTCGTTGTTCCACTTTTACACTATTGAAGAAGATGTGAAGCTCTCCC
ms-3. seq    ATGAAAATAAAAGCTTCGTTGTTCCACTTTTACACTATTGAAGAAGATGTGAAGCTCTCCC
*****

WT. seq      CAAAACCCTACTGCGATCAATGCCGATGTTCTGGTTTGAATCTTTTTCTCTACTGAGTT
ms-3. seq    CAAAACCCTACTGCGATCAATGCCGATGTTCTGGTTTGAATCTTTTTCTCTACTGAGTT
*****

WT. seq      TCTCTGTTTCTATGGATTCTGTTTCATGGCTGATTGTTTTTTCTGATTTTTTTTTCAGGG
ms-3. seq    TCTCTGTTTCTATGGATTCTGTTTCATGGCTGATTGTTTTTTCTGATTTTTTTTTCAGGG
*****

WT. seq      TGGAGTAATCATTTTGTATCGAAAAGAAAATATCATATCGTAATACCGTTGGATGATCGG
ms-3. seq    TGGAGTAATCATTTTGTATCGAAAAGAAAATATCATATCGTAATACCGTTGGATGATCGG
*****

WT. seq      TGAACAACGATTAGACGATGGCGGTTTCGACCTCGATGATCAAACCTCATCTTCTTCAT
ms-3. seq    TGAACAACGATTAGACGATGGCGGTTTCGACCTCGATGATCAAACCTCATCTTCTTCAT
*****

WT. seq      GGATTGATTCACTGCAATGGCTTCGGGCATTGCTCTGCGTCAATGGAATCGAAGGAGGA
  
```

*ms-3*. seq GGATTGATTCACTGCAATGGCTTCGGGCATTGCTCTGCGTCAATGGAATCGAAGGAGGA

\*\*\*\*\*

WT. seq TCCAAGTTTCTTTGTGGCAGAGAAGTTATGGATCTTTGGGATAGAATCTGCACAAATCTA

*ms-3*. seq TCCAAGTTTCTTTGTGGCAGAGAAGTTATGGATCTTTGGGATAGAATCTGCACAAATCTA

\*\*\*\*\*

WT. seq AGAACAAGGTGTAAGAATGGAAGTTATGAATGACTATGATAAAATTGTTGTTCTTCTCT

*ms-3*. seq AGAACAAGGTGTAAGAATGGAAGTTATGAATGACTATGATAAAATTGTTGTTCTTCTCT

\*\*\*\*\*

WT. seq GCCGAAAAGAAATTTTCTCTAACTTTCTGTTGGTTCTTAGGAAAATTACAGTTGAGGA

*ms-3*. seq GCCGAAAAGAAATTTTCTCTAACTTTCTGTTGGTTCTTAGGAAAATTACAGTTGAGGA

\*\*\*\*\*

WT. seq TTTATCCAAGAAACGATCAATGGATCTACGTCTTCTTCATGGGGTAGCATACGGTCATCC

*ms-3*. seq TTTATCCAAGAAACGATCAATGGATCTACGTCTTCTTCATGGGGTAGCATACGGTCATCC

\*\*\*\*\*

WT. seq ATGTTTGGGAGATGGGGCTACAGATTTTGCCGAGGAAGCTTGGAGTAAAAGAACACCA

*ms-3*. seq ATGTTTGGGAGATGGGGCTACAGATTTTGCCGAGGAAGCTTGGAGTAAAAGAACACCA

\*\*\*\*\*

WT. seq TTACAGTAGAGCTTTGGAAATCCTCAGCTCTCTGGAACCTGACAAGATAATGCACGAAGT

*ms-3*. seq TTACAGTAGAGCTTTGGAAATCCTCAGCTCTCTGGAACCTGACAAGATAATGCACGAAGT

\*\*\*\*\*

WT. seq CGACTATAGCGATCGAGGAAGAGAAGTGAAGCAAATCATTGACATTATCGAAATCTGAG

*ms-3*. seq CGACTATAGCGATCGAGGAAGAGAAGTGAAGCAAATCATTGACATTATCGAAATCTGAG

\*\*\*\*\*

WT. seq TGAAACGCAGTTGATCAGACTGAAAGATCTACTGAAGTTCATGTTGACAGTAAAATATGT

*ms-3*. seq TGAAACGCAGTTGATCAGACTGAAAGATCTACTGAAGTTCATGTTGACAGTAAAATATGT

\*\*\*\*\*

WT. seq TTCTGCGATCGAGAAGAAAACGGTTCAACCAATCGCTAAATCTCCTCCTCCGTGTAGACA

*ms-3*. seq TTCTGCGATCGAGAAGAAAACGGTTCAACCAATCGCTAAATCTCCTCCTCCGTGTAGACA

\*\*\*\*\*

WT. seq ATCTCTGCAGCGAAACAAGCAGCAATCTCTAGTGAAGGAGAAGCAAATACGGTACAGAAA

*ms-3*. seq ATCTCTGCAGCGAAACAAGCAGCAATCTCTAGTGAAGGAGAAGCAAATACGGTACAGAAA

\*\*\*\*\*

WT. seq ATTCGCCACTGCAATTTCTAATATGGACAGCCGATGGCCGGCAGACGGTTAGAATACGC

*ms-3*. seq ATTCGCCACTGCAATTTCTAATATGGACAGCCGATGGCCGGCGAGACGGTTAGAATACGG

\*\*\*\*\*

WT. seq AGCGGAGGTGATTGTGAAAGCATTGGAAGAGAAGAAATCAGATAAATTCAGCCATGGCGG

*ms-3*. seq AGCGGAGGTGATTGTGAAAGCATTGGAAGAGAAGAAATCAGATAAATTCAGCCATGGCGG

\*\*\*\*\*

WT. seq AAATGGAATGACTCGTCAAGATGTTTCGAGATGCTGCTCGCCTTCACATCGGCGACTGG

*ms-3*. seq AAATGGAATGACTCGTCAAGATGTTTCGAGATGCTGCTCGCCTTCACATCGGCGACTGG

\*\*\*\*\*

WT. seq ATTGCTCGATTACGTTCTAAAATCACTGAACAACGTGATCGTAGGTAACCAAATAGTTCC

*ms-3*. seq ATTGCTCGATTACGTTCTAAAATCACTGAACAACGTGATCGTAGGTAACCAAATAGTTCC

\*\*\*\*\*

WT. seq CCGTGCAGTGAATCCTAAAACACGAATTTTAGAGTACACGATTCATGAACTTAGAAATGG

*ms-3*. seq CCGTGCAGTGAATCCTAAAACACGAATTTTAGAGTACACGATTCATGAACTTAGAAATGG

\*\*\*\*\*

WT. seq CATTCAATTAACAGAAGAGCAAGAATCAACAGAAAATTCAGAACCAACCGTAACTCCTGG

*ms-3*. seq CATTCAATTAACAGAAGAGCAAGAATCAACAGAAAATTCAGAACCAACCGTAACTCCTGG

\*\*\*\*\*

WT. seq CAAAGACATTTACAACGACGTGCTATGTATATACAGAAGCATTTCCTTGACTATCCAGA

*ms-3*. seq CAAAGACATTTACAACGACGTGCTATGTATATACAGAAGCATTTCCTTGACTATCCAGA

\*\*\*\*\*

WT. seq ATCAGAAATGGTAGAATTAGCAACCCAGGGAGTTCTCGATAGTAAACATTTTGCTAAAGA

*ms-3*. seq ATCAGAAATGGTAGAATTAGCAACCCAGGGAGTTCTCGATAGTAAACATTTTGCTAAAGA

\*\*\*\*\*

WT. seq ATGGCCTCTCAAGATGAAGAAGAGCATCTATTGACGTTTATTCAAATGATGCCGAG

*ms-3*. seq ATGGCCTCTCAAGATGAAGAAGAGCATCTATTGACGTTTATTCAAATGATGCCGAG

\*\*\*\*\*

WT. seq GCTAACTTTTACACATACGGATTTAGAGTTGAAGAGTGATTCATGCCATCCGGCGAGGT

*ms-3*. seq GCTAACTTTTACACATACGGATTTAGAGTTGAAGAGTGATTCATGCCATCCGGCGAGGT

\*\*\*\*\*

WT. seq AGTGGTTCTTCCACTACACACAACAATCGGAGAAGTAAAAGAAGCAGCAGAAAAAGCTCT

*ms-3*. seq AGTGGTTCTTCCACTACACACAACAATCGGAGAAGTAAAAGAAGCAGCAGAAAAAGCTCT

\*\*\*\*\*

WT. seq AAGAGACACATATTACGTTACGGAACAGTTCGAGTTTTGGCGATAGAGAATTTGGAGAA

*ms-3*. seq AAGAGACACATATTACGTTACGGAACAGTTCGAGGTTTTGGCGATAGAGAATTTGGAGAA  
\*\*\*\*\*

WT. seq TTACGAAGACAGAGAGGTGATTTTTGGAGCGGTAGAATCGGGAGCAGAGTTGTTTGTGAA  
*ms-3*. seq TTACGAAGACAGAGAGGTGATTTTTGGAGCGGTAGAATCGGGAGCAGAGTTGTTTGTGAA  
\*\*\*\*\*

WT. seq AGGAATGGGTATTGATTTAGATACACCATTGAAGTACCAAGGAGGAGTTGGTACATGGAA  
*ms-3*. seq AGGAATGGGTATTGATTTAGATACACCATTGAAGTACCAAGGAGGAGTTGGTACATGGAA  
\*\*\*\*\*

WT. seq AGTTCGATGTGAGTGTGGCACCGGAGACGACGATGGCGAGAGGATGGTGGCTTGTGACAT  
*ms-3*. seq AGTTCGATGTGAGTGTGGCACCGGAGACGACGATGGCGAGAGGATGGTGGCTTGTGACAT  
\*\*\*\*\*

WT. seq ATGCGAGATCTGGCAGCACACTCGCTGCTGTGGAATCGACGACGCTGATAATGTGCCGTT  
*ms-3*. seq ATGCGAGATCTGGCAGCACACTCGCTGCTGTGGAATCGACGACGCTGATAATGTGCCGTT  
\*\*\*\*\*

WT. seq GTTGTTTCGTATGCGCCGCTGCTGCGACTCGCTTGGACAATTA AAAAATTTGAATGGAATT  
*ms-3*. seq GTTGTTTCGTATGCGCCGCTGCTGCGACTCGCTTGGACAATTA AAAAATTTGAATGGAATT  
\*\*\*\*\*

WT. seq TTGTTTGTATGCGCCGTTGTTCCGGTGATGACTTCATTGACTAAACTTTTTGTTTGTAAAT  
*ms-3*. seq TTGTTTGTATGCGCCGTTGTTCCGGTGATGACTTCATTGACTAAACTTTTTGTTTGTAAAT  
\*\*\*\*\*

WT. seq TACATTACATATGCATCTTCCCTCAACAATTA AAAAATGAGGCATTGGTTTCTATATCCT  
*ms-3*. seq TACATTACATATGCATCTTCCCTCAACAATTA AAAAATGAGGCATTGGTTTCTATATCCT  
\*\*\*\*\*
