# Supplementary material for: Fine mapping of a male sterility gene ms-3 in a novel cucumber (Cucumis sativus L.) mutant
Source: PubMed Central journal article supplement (PMC5787221; doi:10.1007/s00122-017-3013-2), 2017-11-13
Supplement: 122_2017_3013_MOESM3_ESM.pdf [file 122_2017_3013_MOESM3_ESM.pdf]

Fig S3. Multiple sequence alignment of the non-synonymous single nucleotide polymorphism (SNP) loci of *Csa3M006660* from 8 Southern Chinese fertile lines (F1-F8), 10 Northern Chinese fertile lines(F9-F18), 8 Beit apha fertile lines (F19-F26), 2 Japanese fertile lines(F27-F28), WT and *ms-3*. (Black= Conversed region)

|                   |                              |                                 |
|-------------------|------------------------------|---------------------------------|
| F1. seq           | GTGAATCCTAAAACACGAATTTTAGAGT | ACACGATTCATGAACTTAGAAATGGCATTCA |
| F2. seq           | GTGAATCCTAAAACACGAATTTTAGAGT | ACACGATTCATGAACTTAGAAATGGCATTCA |
| F3. seq           | GTGAATCCTAAAACACGAATTTTAGAGT | ACACGATTCATGAACTTAGAAATGGCATTCA |
| F4. seq           | GTGAATCCTAAAACACGAATTTTAGAGT | ACACGATTCATGAACTTAGAAATGGCATTCA |
| F5. seq           | GTGAATCCTAAAACACGAATTTTAGAGT | ACACGATTCATGAACTTAGAAATGGCATTCA |
| F6. seq           | GTGAATCCTAAAACACGAATTTTAGAGT | ACACGATTCATGAACTTAGAAATGGCATTCA |
| F7. seq           | GTGAATCCTAAAACACGAATTTTAGAGT | ACACGATTCATGAACTTAGAAATGGCATTCA |
| F8. seq           | GTGAATCCTAAAACACGAATTTTAGAGT | ACACGATTCATGAACTTAGAAATGGCATTCA |
| F9. seq           | GTGAATCCTAAAACACGAATTTTAGAGT | ACACGATTCATGAACTTAGAAATGGCATTCA |
| F10. seq          | GTGAATCCTAAAACACGAATTTTAGAGT | ACACGATTCATGAACTTAGAAATGGCATTCA |
| F11. seq          | GTGAATCCTAAAACACGAATTTTAGAGT | ACACGATTCATGAACTTAGAAATGGCATTCA |
| F12. seq          | GTGAATCCTAAAACACGAATTTTAGAGT | ACACGATTCATGAACTTAGAAATGGCATTCA |
| F13. seq          | GTGAATCCTAAAACACGAATTTTAGAGT | ACACGATTCATGAACTTAGAAATGGCATTCA |
| F14. seq          | GTGAATCCTAAAACACGAATTTTAGAGT | ACACGATTCATGAACTTAGAAATGGCATTCA |
| F15. seq          | GTGAATCCTAAAACACGAATTTTAGAGT | ACACGATTCATGAACTTAGAAATGGCATTCA |
| F16. seq          | GTGAATCCTAAAACACGAATTTTAGAGT | ACACGATTCATGAACTTAGAAATGGCATTCA |
| F17. seq          | GTGAATCCTAAAACACGAATTTTAGAGT | ACACGATTCATGAACTTAGAAATGGCATTCA |
| F18. seq          | GTGAATCCTAAAACACGAATTTTAGAGT | ACACGATTCATGAACTTAGAAATGGCATTCA |
| F19. seq          | GTGAATCCTAAAACACGAATTTTAGAGT | ACACGATTCATGAACTTAGAAATGGCATTCA |
| F20. seq          | GTGAATCCTAAAACACGAATTTTAGAGT | ACACGATTCATGAACTTAGAAATGGCATTCA |
| F21. seq          | GTGAATCCTAAAACACGAATTTTAGAGT | ACACGATTCATGAACTTAGAAATGGCATTCA |
| F22. seq          | GTGAATCCTAAAACACGAATTTTAGAGT | ACACGATTCATGAACTTAGAAATGGCATTCA |
| F23. seq          | GTGAATCCTAAAACACGAATTTTAGAGT | ACACGATTCATGAACTTAGAAATGGCATTCA |
| F24. seq          | GTGAATCCTAAAACACGAATTTTAGAGT | ACACGATTCATGAACTTAGAAATGGCATTCA |
| F25. seq          | GTGAATCCTAAAACACGAATTTTAGAGT | ACACGATTCATGAACTTAGAAATGGCATTCA |
| F26. seq          | GTGAATCCTAAAACACGAATTTTAGAGT | ACACGATTCATGAACTTAGAAATGGCATTCA |
| F27. seq          | GTGAATCCTAAAACACGAATTTTAGAGT | ACACGATTCATGAACTTAGAAATGGCATTCA |
| F28. seq          | GTGAATCCTAAAACACGAATTTTAGAGT | ACACGATTCATGAACTTAGAAATGGCATTCA |
| WT. seq           | GTGAATCCTAAAACACGAATTTTAGAGT | ACACGATTCATGAACTTAGAAATGGCATTCA |
| <i>ms-3</i> . seq | GTGAATCCTAAAACACGAATTTTAGAGG | ACACGATTCATGAACTTAGAAATGGCATTCA |
| *****             |                              |                                 |
