# Supplementary material for: Fine mapping of a male sterility gene ms-3 in a novel cucumber (Cucumis sativus L.) mutant
Source: PubMed Central journal article supplement (PMC5787221; doi:10.1007/s00122-017-3013-2), 2017-11-13
Supplement: 122_2017_3013_MOESM4_ESM.pdf [file 122_2017_3013_MOESM4_ESM.pdf]

Fig S4. Alignment of protein sequences of cucumber Csa3M006660 and the closest homologs from 25 other plants species using CLUSTAL 2.1 The tyrosine residue created by the non-synonymous single nucleotide polymorphism (SNP) locus is shown in solid red boxes and the PHD domain is indicated with an empty red boxes.

|                                             |                                                               |
|---------------------------------------------|---------------------------------------------------------------|
| XP_011652709.1[Cucumis_sativus]             | -----MSISILESCKK-RKRRPKLFGFQTFGDPG-SPINPTG--PFRENIRIFLQQCAE   |
| XP_007216520.1[Prunus_persica]              | -----MSIPILEACKK-RKRRPKIYGFSSFCDPG-CPIGPNG--PFRDNIRLFLQECAE   |
| XP_008244388.1[Prunus_mume]                 | -----MSIPILEACKK-RKRRPKIYGFSSFCDPG-FPIGPNG--PFRDNIRLFLQECAE   |
| XP_018505942.1[Pyrus_x_bretschneideri]      | -----MSIPILEACKK-KKRRPKIFGLQTFCDPG-CPISLIG--PFRDNVRFVFLQECAE  |
| OAY60550.1[Manihot_esculenta]               | -----MSLPVLETCKR-RKRRPKVYSFHSFGDPG-CPMNPTG--PFRDNIRLFLQECAE   |
| XP_008381356.1[Malus_domestica]             | -----MSIPILEACKK-KKRRPKIFGLQSFCDPG-CPISLIG--PFRDNIRFVFLQECAQ  |
| XP_018816590.1[Juglans_regia]               | -----MSISILEACKK-RKRRPKLYGFQNFCDPG-CPIDPKG--AFRDNIRLFLQECAD   |
| XP_002263205.1[Vitis_vinifera]              | -----MSIPILEACKK-RKRRPKLFGFHTFADPG-CPINPTS--HFCDNIRIFLRECAE   |
| XP_004288593.1[Fragaria_vesca_subsp._vesca] | -----MMIPTLEASKK-RKRRPKVYGFHSFGEPG-YPIPLG--PFRDNIRLFLQQCAE    |
| XP_017981172.1[Theobroma_cacao]             | -----MSIPIIETCRK-RKRRPKLFLGRSFAEPG-CPINPTG--PFRDNIRFVFLKQCAE  |
| XP_006372523.1[Populus_trichocarpa]         | -----MSIPNLENCKK-RKRWPKLYDFNTFCEPD-CPINPRG--PFRDNMRLFLQQCAE   |
| XP_011038253.1[Populus_euphratica]          | -----MSIPNLENCKK-RKRWPKLYDFNTFCEPD-CPINPRG--PFRDNMRLFLQQCAE   |
| XP_012086460.1[Jatropha_curcas]             | -----MSLPFLEACRK-RKRRPKLYNFHSFGDPG-CPISPMG--PFRDNIRIFLQECAV   |
| XP_006494662.1[Citrus_sinensis]             | -----MSISTLESCKK-RKRRPKLFGFHTFMESG-CPISPTG--AFRDNVRQFLSACGE   |
| XP_006421081.1[Citrus_clementina]           | -----MSISTLESCKK-RKRRPKLFGFHTFMESG-CPISPTG--AFRDNVRQFLSACGE   |
| XP_002533478.1[Ricinus_communis]            | -----MSIPVLQTCKMMRKRKTQVYNFHSFGDPG-SAINPTG--PFRDNIRAFLQECAE   |
| XP_010108961.1[Morus_notabilis]             | -----MSIPIIEACKK-RKRRPKLFAFNAFGDES-GIPRFRC--PFRDKVRIFLKECAE   |
| XP_003616245.2[Medicago_truncatula]         | -----MSFSIIDASKK-RKRWTKIFPLQSFADPG-CPISPSG--PFRENVRLFLQEAGE   |
| OAP18009.1[Arabidopsis_thaliana]            | -----MPVPIIETCRK-RKRKPKVYNLQRFGEDG-FPIQRNG--AFRDQIRVFLRDCAE   |
| BAK05033.1[Hordeum_vulgare_subsp._vulgare]  | MAAK---MVISLGSSRR-RKRGEVLRFRDQFCQPG-YPAQLAG--AFRDNVRTLLGLAHL  |
| CDM85226.1[Triticum_aestivum]               | -----MNVNRPPLKKARTRAEARDFAGFPAAT--DGGAVG--TFREAVRGFLARHAR     |
| XP_008657002.1[Zea_mays]                    | -----MNVNRPPLKRARARVEARDFARFPAAG--DCGAAG--TFREAVRGFLAKHAR     |
| EAZ44935.1[Oryza_sativa_Japonica_Group]     | MAPK---MVISLGSSRR-RKRGEMLFRFEAFQCPG-YPANFAGAGGFNRDNVRTLLGFAHL |
| XP_002460302.1[Sorghum_bicolor]             | MAAANKTMVISLGSSRR-RKRGEMLFRFESFCQPG-YAPLAGGGAFRDNVRALLGLAHL   |
| XP_003544360.1[Glycine_max]                 | -----MSFALIEACKK-RKRLPKFFRFNSFGDPGVVPIAPSG--PFRDNVRFVFLQNAGE  |

```

XP_003578202.1[Brachypodium_distachyon]   MAAK---MVINLGSSRR-RKRGEVLFREFESFCQPG-YPAQLAG--PFRDNVRTLLGLAHL
                                           *               *   *   *

XP_011652709.1[Cucumis_sativus]           IEDY-----RIQEMPIWCTLLVHENKS-----FVVPLYTIEEDVKLSP-KPYC
XP_007216520.1[Prunus_persica]             LEDY-----SVQGMPTWCTLLVHDNRS-----LVVPLYTIEEDVKTSERP-FC
XP_008244388.1[Prunus_mume]                LEDY-----SVQGMPTWCTLLVHDNRS-----LVVPLYTIEEDVKTSERP-FC
XP_018505942.1[Pyrus_x_bretschneideri]     REDY-----TVRGMPIWCTLLVHDNRS-----LVVPLYTIEEDVKTSEEP-FC
OAY60550.1[Manihot_esculenta]              PEDY-----NVEGMPIWCTLLVIESNN-----FVVPLYTIEENVHFSPNP-FC
XP_008381356.1[Malus_domestica]            REDY-----TVRGMPIWCTLLVHDNRS-----LVVPLYTIEEDVKTSEEP-FC
XP_018816590.1[Juglans_regia]              LHEN-----DIHAMPTWCTLLVHETRK-----FVVPLYTFEEDVKCSPRPYK
XP_002263205.1[Vitis_vinifera]            LEDY-----NVDGMPTWCTLLVNENRG-----FVVVPLYTIEESVKYAAKP-FC
XP_004288593.1[Fragaria_vesca_subsp._vesca] LESY-----SLLGMPVWCTLLVHDDRS-----LVLPLYTIEENVKSDNP-FC
XP_017981172.1[Theobroma_cacao]           PEDY-----CVNGMPIWCTLLVHENKS-----SVVPLYTIKEDVKLSSNP-FC
XP_006372523.1[Populus_trichocarpa]       PEDY-----KVEGMSIWCTLLVIESKN-----FVVPLYTIEEDVKESVRP-FC
XP_011038253.1[Populus_euphratica]        PEDY-----KVEGMSIWCTLLVIESKN-----FVVPLYTIEEDVKESVRP-FC
XP_012086460.1[Jatropha_curcas]           RQDY-----TIEGMPIWSTLLVIESNS-----FVVPLYTIEENVKYSSNP-FC
XP_006494662.1[Citrus_sinensis]           LEDY-----KVEGMSIWCTLLVHESSE-----IVFPLYTIEEHVRHSPQP-YC
XP_006421081.1[Citrus_clementina]         LEDY-----KVEGMSIWCTLLVHESSE-----IVFPLYTIEEHVKHSPQP-YC
XP_002533478.1[Ricinus_communis]          PEDY-----NVDGMPVWCTHLAIESKS-----TVLPLYTIEENANDSPNP-FC
XP_010108961.1[Morus_notabilis]           VEDY-----QVLGMPIWCTLLVHENRN-----LVIPLYTIEETVKDSPLKSYK
XP_003616245.2[Medicago_truncatula]       LEDY-----TVMGNPLWCTFLIHEKKN-----LMVFPYALEEEVYNSSHP-FC
OAP18009.1[Arabidopsis_thaliana]          IEDY-----DIRGMPVWCTLLSHETKS-----SLIPLYIVEENVKHSSEP-YC
BAK05033.1[Hordeum_vulgare_subsp._vulgare] EAG-----VQGETRCWSFQLELHRHPP-----TVVRLFVVEEEVAASPHR-QC
CDM85226.1[Triticum_aestivum]             LLPLPSIFSPAAAAAPPHELLTWRVSLRVGEEGAEEDAGGCGVELNVVEEDVLRSR-SVYC
XP_008657002.1[Zea_mays]                  LLPLPSIFSPAAAAAPPHELLIWRVSLRVGEAGEEESGG--GVELNVVEEDVLRSR-SVYC
EAZ44935.1[Oryza_sativa_Japonica_Group]   EAG-----VHGETKCSWFQLELHRHPP-----TVVRLFVVEEEVAASPHR-QC
XP_002460302.1[Sorghum_bicolor]           EAGG-----AHGDTKCSWFQLELHRHPP-----TVVRLFVVEEVDASPHR-QC
XP_003544360.1[Glycine_max]               LEGY-----TVSGNPLWCILLIHDNSN-----AMAPLYTIEEHVDHSSHP-FC

```

|                                             |                                                             |
|---------------------------------------------|-------------------------------------------------------------|
| XP_003578202.1[Brachypodium_distachyon]     | EAG-----VQGETRCWSFQLELQRHPP-----TVVRLFIVEEEVAASPRR-QC       |
|                                             | * * * *                                                     |
| XP_011652709.1[Cucumis_sativus]             | DQCRCGWSNHFVSKRKYHIVIPDDRWNKRLDDGGFDLDD-----                |
| XP_007216520.1[Prunus_persica]              | DHCRCCTGWSNHFVSKRKYHIIIPMDDEWHKPLEDGICDLP-----              |
| XP_008244388.1[Prunus_mume]                 | DHCRCCTGWSNHFVSKRKYHIIIPMDDEWHKPLEDGICDLP-----              |
| XP_018505942.1[Pyrus_x_bretschneideri]      | DQCRCCTGWSNHFVSKRKYHMIIPVEDEWHKPDNGILNLP-----               |
| OAY60550.1[Manihot_esculenta]               | DHCRCCTGWSNHFVSKRKYHVIIP IAGEWSKRLEEGALDLH-----             |
| XP_008381356.1[Malus_domestica]             | DQCRCCTGWSNHFVSKRKYHMIIPVDDEWHKPLDNGILDLP-----              |
| XP_018816590.1[Juglans_regia]               | DHCRCAGWSNHFVSKRKYHLIIPADEDWNKPLDDDLIDLQ-----               |
| XP_002263205.1[Vitis_vinifera]              | DHCRCCTGWSNHFVSKRKYHIIIPIDDEWKNPLDDGVFDLQ-----              |
| XP_004288593.1[Fragaria_vesca_subsp._vesca] | DHCRCCTGWSNHFVSKRKYHMIIPMNDDWKNPLDDDLIFDLS-----             |
| XP_017981172.1[Theobroma_cacao]             | DHCRCCTGWSNHFVSKRKYHVVIPNDRDWNKPLEDGVLNH-----               |
| XP_006372523.1[Populus_trichocarpa]         | DLCRCNGWSHNSVSKRKYHMIIPVDSEWSQKLEDGVCDLQ-----               |
| XP_011038253.1[Populus_euphratica]          | DLCRCNGWSHNSVSKRKYHMIIPVDSEWSQKLEDGVCDLQ-----               |
| XP_012086460.1[Jatropha_curcas]             | DHCRCCTGWSNHFVSKRKYHLIIPNDSEWNEQLEG-VFDLQ-----              |
| XP_006494662.1[Citrus_sinensis]             | DQCRCGWSNHFVSKRKYHWIIPIDCDWKNPLEDGVFDLQ-----                |
| XP_006421081.1[Citrus_clementina]           | DQCRCGWSNHFVSKRKYHWIIPIDCDWKNPLEDGVFDLQ-----                |
| XP_002533478.1[Ricinus_communis]            | DHCRCCTGWSNHFVSKRKYHVIIPIDEEWKNRLEEGVFDVH-----              |
| XP_010108961.1[Morus_notabilis]             | DHCRCCTGWSNHFVSKRKYHFLIPSDSRWNKPLDESVDV-----                |
| XP_003616245.2[Medicago_truncatula]         | DHCRCVGSNHFVSKRKYHFIIPMDDGWHKPLNEEALDDQ-----                |
| OAP18009.1[Arabidopsis_thaliana]            | DHCRCCTGWSNHFVSKRKYHFIIPIDTEWSLPLEDDAFDSQ-----              |
| BAK05033.1[Hordeum_vulgare_subsp._vulgare]  | HLCRVIGWGRHLICKRFHFVLP-KRESSVETDGLCYGIG-----GADKAS-----     |
| CDM85226.1[Triticum_aestivum]               | DQCRVVGWSGHPVCGKRYHFI IENDSIQAGRRRTCCLCRGTMAAAESRCLLCNFDMEG |
| XP_008657002.1[Zea_mays]                    | DQCRVVGWSGHPVCKRYHFI IENDSSHLSGRRRTCCLCRGTMAAGESRCALCNFMDMG |
| EAZ44935.1[Oryza_sativa_Japonica_Group]     | HLCRHIGWGRHLICKRYHFLLP-RRESAAEADGLCFAINHGGGG-GAEKASSK-----  |
| XP_002460302.1[Sorghum_bicolor]             | LLCRHVIGWGRHLICKRFHFVLP-KRELSVEADGLHYGINHG-----PEKPS-K----- |
| XP_003544360.1[Glycine_max]                 | DHCRCVGSNHFVSKRKYHFIIPMDNGWHKPLDESDIDNQ-----                |

XP\_003578202.1[Brachypodium\_distachyon] HLCRLIGWGRHLICSKRFHFLP-KRESTVETDGLCYGISSSHGGGGTEKASSK-----  
 \*\* \*\* \*

XP\_011652709.1[Cucumis\_sativus] -----Q-----THLLHGLIHCNGFGHLLCVNGIEGGSKFLCGREVMDLWDRICTNLR  
 XP\_007216520.1[Prunus\_persica] -----THLLHGLIHCNGYAHLVCVNGLEGGSKHLCGREIMDLWDRVCTNLR  
 XP\_008244388.1[Prunus\_mume] -----THLLHGLIHCNGYAHLVCVNGLEGGSKHLCGREIMDLWDRVCTNLR  
 XP\_018505942.1[Pyrus\_x\_bretschneideri] -----THLLHGLIHCNGFAHLVCINGLEGGSKHLYGREIMDLWDRICTNLR  
 OAY60550.1[Manihot\_esculenta] -----THILHGMHCNGFGHLLCINGIEGGSKFLCGREIMDLWDRICANLR  
 XP\_008381356.1[Malus\_domestica] -----THLLHGLIHCNGFAHLVCINGLEGGSKHLYGREIMDLWDRICTNLR  
 XP\_018816590.1[Juglans\_regia] -----NHLHGLIHCNGFGHLICINGIEGGSKYLCGREIMDLWDRICTNLG  
 XP\_002263205.1[Vitis\_vinifera] -----THLLHGMHCNGFGHLLCINGIEGGSGYLCGREIMDLWDRICITLR  
 XP\_004288593.1[Fragaria\_vesca\_subsp.\_vesca] -----THLLHGLIHCNGFAHLVCINGHEGGSKHLCGREIMDLWDRICLSLR  
 XP\_017981172.1[Theobroma\_cacao] -----SHLLHGLIHCNGFGHLLCINGIEGGSKYLCGREIMDLWDRICEILR  
 XP\_006372523.1[Populus\_trichocarpa] -----THLLHGLIHCNGFGHLLCINGREGGSKYLCGREIMDLWDRICASLR  
 XP\_011038253.1[Populus\_euphratica] -----THLLHGLIHCNGFGHLLCINGREGGSKYLCGREIMDLWDRICASLR  
 XP\_012086460.1[Jatropha\_curcas] -----NHLHGLIHCNGFGHLLCINGIEGGSKILCGREIMDLWDRICANLQ  
 XP\_006494662.1[Citrus\_sinensis] -----THILHGLIHCNGFGHLLSINGIEGGSGYLCGREIMDLWDRICTNLR  
 XP\_006421081.1[Citrus\_clementina] -----THILHGLIHCNGFGHLLSINGIEGGSGYLCGREIMDLWDRICTNLR  
 XP\_002533478.1[Ricinus\_communis] -----THILHGLIHCNGFGHLLCINGIEGGSKTLSGREIMDLWDRICINLR  
 XP\_010108961.1[Morus\_notabilis] -----Q-----SHLLYGLIHCNGFGHLLGINGMEGGSKYLFGREIMDLWDRICGKLT  
 XP\_003616245.2[Medicago\_truncatula] -----SHLLHGVHCNGYGHVCLNGIEGGSKFLSGREIMDLWDRICTNLR  
 OAP18009.1[Arabidopsis\_thaliana] -----SHVLHGLIHCNGFGHLVCVNGMESGSKYLCGREIVDFWDRICNSLG  
 BAK05033.1[Hordeum\_vulgare\_subsp.\_vulgare] -----KGTATSRGHLHGVHNLNGYGHVGLHGFEGGSDVSVGHQIMDLWDRICSAH  
 CDM85226.1[Triticum\_aestivum] EELEECGYLHLLDSSHLLHAVVHANGYGHLLRVNGREGGSRHLTGRDIMSFDRLCKVLH  
 XP\_008657002.1[Zea\_mays] EEIEECAYLHLLDDPTHLLHAVVHANGYGHLLRVNGREGGSRFLTGRDIMSLWDRICSAH  
 EAZ44935.1[Oryza\_sativa\_Japonica\_Group] -----GTTTASSRGHLHGVHNLNGYGHVVALHGFEGGSDVSVGHQIMDLWDRICSAH  
 XP\_002460302.1[Sorghum\_bicolor] -----G---TATSRGHLHGVHNLNGYGHVVALHGFEGGSEFVAGHQIMDLWDRICSSLN  
 XP\_003544360.1[Glycine\_max] -----KHLHGVHCNGYGHLLCVNGIEGGSKILSGREIDLWDRICTNLR

|                                             |                                                                                               |
|---------------------------------------------|-----------------------------------------------------------------------------------------------|
| XP_003578202.1[Brachypodium_distachyon]     | -----GGTGTASSRGHLLHGVVHLNGYGHLVGLHGFEGGSDFVSGHQIMDLWDRICSAIH<br>* * * * * * * * * * * * * * * |
| XP_011652709.1[Cucumis_sativus]             | TRKITVEDLSKKRSMDLRLLHGVAYGHPWFGRWGYRFCRGSFGVKEHHYSRALEILSSLE                                  |
| XP_007216520.1[Prunus_persica]              | TRKITVEDVSKKRSMDLRLLHGIAYGHSWFGRWGYRFSHGSGVTEHNYERALEILSSLE                                   |
| XP_008244388.1[Prunus_mume]                 | TRKITVEDVSKKRSMDLRLLHGIAYGHSWFGRWGYRFSHGSGVTEHNYERALEILSSLE                                   |
| XP_018505942.1[Pyrus_x_bretschneideri]      | TRKISVEDASKKRSMDLRLLHGVAYGHSWFGRWGYRFSHGSGVTAHNYERAIEILSSLA                                   |
| OAY60550.1[Manihot_esculenta]               | ARKVSVEDVSKKRSMDLRLLYGVAYGHPWYGRWGYKFCRGSFGVTKHYNRAIEILSSLE                                   |
| XP_008381356.1[Malus_domestica]             | TRKISVEDASKKRSMDLRLLHGVAYGHSWFGRWGYRFSHGSGVTAHKYERAIEILSSLA                                   |
| XP_018816590.1[Juglans_regia]               | TRKITVEDVSKKRSMDLRLLYGVAYGHSWFGRWGYRFCRGSFGVAEHNYDRAIEVLSLE                                   |
| XP_002263205.1[Vitis_vinifera]              | TRKITVEDSSKKRFMDLRLLHGVAYGHPWFGRWGYRFSHGSGVKEPNYERAIEILSSLE                                   |
| XP_004288593.1[Fragaria_vesca_subsp._vesca] | TRKITVEDASKKRSMELRLLHGVAYGHPWFGRWGYKFCRGSFGVKEHIYNRAIEILSSLE                                  |
| XP_017981172.1[Theobroma_cacao]             | ARKISVEDVSKKHGMDLRLLHGVAYGHTWFGRWGYKFCRGSYGVSEKNYGRAIEILSSSE                                  |
| XP_006372523.1[Populus_trichocarpa]         | TRKITVEDVSKKRSMDLRLLYGIAYGHPWFGRWGYKFCRGSFGVTEPIYFKAIEILSSME                                  |
| XP_011038253.1[Populus_euphratica]          | TRKITVEDVSKKRSMDLRLLYGIAYGHPWFGRWGYKFCRGSFGVTEPIYFRAIEILSTME                                  |
| XP_012086460.1[Jatropha_curcas]             | ARKISVQDVSKKRSMELRLLYGVAYGHSWFGRWGYKFCRGSFGVKLQNYNQAIEILCSLE                                  |
| XP_006494662.1[Citrus_sinensis]             | TCKVTVEDVSKKKSMDLRLLHGVAYGHSWFGRWGYKFFHGSFGVREQNYNRAIEILSSLE                                  |
| XP_006421081.1[Citrus_clementina]           | TCKVTVEDVSKKKSMDLRLLHGVAYGHSWFGRWGYKFFHGSFGVREQNYNRAIEILSSLE                                  |
| XP_002533478.1[Ricinus_communis]            | ARKISVEDVSKKRSMELRLLYGVAYGHSWFGRWGYKFCRGSFGVTEHNYNSAIEILSSLA                                  |
| XP_010108961.1[Morus_notabilis]             | ARKITVADASKKRSMELRLLHGVAYGHPWFGRWGYGFCRGSFGVKDFNYKRAIEILCSLE                                  |
| XP_003616245.2[Medicago_truncatula]         | ARYIAVEDASRKRSMDLRLLHGVAYGHSWFGRWGYGFCRGSFGVTQQNYDEAIEILGSLV                                  |
| OAP18009.1[Arabidopsis_thaliana]            | ARMITVEDLAKKRSMELRLLYGVAYGHSWFGRWGYKFCRGSFGVTKNEYENAIEALGSLE                                  |
| BAK05033.1[Hordeum_vulgare_subsp._vulgare]  | VRRVSLVDTARKGHMVLRLHGVAYGDTWFGRWGYRGRPSYGVVALQSYQQSLHALQSIP                                   |
| CDM85226.1[Triticum_aestivum]               | VRKVTVMDISKKQGM DYRL LHAI TTGHPWYGEWGYKFGAGSFAHTSDTYQEAVNVLSGIH                               |
| XP_008657002.1[Zea_mays]                    | VRKVTVMDISKKHGM DYRL LHAV ISGHPWYGGWGYKFGAGSFALTSDTYRNAVDMLSSIN                               |
| EAZ44935.1[Oryza_sativa_Japonica_Group]     | VRTVSLVDTARKGHMELRLLHGVAYGETWFGRWGYRGRPSYGVVALPSYRQSLHVLGSMF                                  |
| XP_002460302.1[Sorghum_bicolor]             | VRKVSVDLDTARKGHMELRLLHGVAYGDTWFGRWGYRFRGRPSYGVVALPSYRQSLHALQSVF                               |
| XP_003544360.1[Glycine_max]                 | ARKIAVEDVSKKRSMDLRLLHGVAYGHSWFGRWGYRFCRGSFGVREYREYNEAMTMLGSLG                                 |

|                                             |                                                               |
|---------------------------------------------|---------------------------------------------------------------|
| XP_003578202.1[Brachypodium_distachyon]     | VRKVSLVDTARKGHMVLRLHLGVAYGDTWFGRWGYRGRPSYGVTLQSYQQSLHALQSV    |
|                                             | * * *** * * * * * * * *                                       |
| XP_011652709.1[Cucumis_sativus]             | LDKIMHEVDYSDRGREVKQIIRHYRNLSETQLITLKDLLKFMLTVKY-VSAIEKKTVP    |
| XP_007216520.1[Prunus_persica]              | LERIIQAFSDMDQCDELKQIIRYYKNLSETQLITIKDLLRFMLTVKA-SVPAQKKSLMAT  |
| XP_008244388.1[Prunus_mume]                 | LERIIQAFSDMDQCDELKQIIRYYKNLSETQLITIKDLLRFMLTVKA-SVPAQKKSLMAT  |
| XP_018505942.1[Pyrus_x_bretschneideri]      | LERILQDFIDMDGCEELKQIIRYYRNLSETKLVTIKDLLRFMLTVKS-SVPGQKKSLMXX  |
| OAY60550.1[Manihot_esculenta]               | LDKIIQDFKNSDQCKEMKQIIHYRDLSETLLMTFKDLLRFMLTVKS-CPCAQRKRSMAP   |
| XP_008381356.1[Malus_domestica]             | LERILQDFIDMDXCEELKQIIRYYRNLSETKLVTIKDLLRFMLTVKS-SVPGQKKSLMGP  |
| XP_018816590.1[Juglans_regia]               | LDKTIQDFSTMEKRREIKQLILHYRYMSETQLVTIKDLLRFMLTIKS-RAPLQINKPAAA  |
| XP_002263205.1[Vitis_vinifera]              | LDQIIEDFGCTDRCMKIRQIFRFYRDLSETQLITLKDILRIMLTLKS-RAPVQKKMNIVP  |
| XP_004288593.1[Fragaria_vesca_subsp._vesca] | LEKIIQDFSDMDQYEELKQIIRYYRNLSETQLVTIKDLLRFMLTVKA-CFPAKRNSLLPT  |
| XP_017981172.1[Theobroma_cacao]             | LDKINQDFSDREQCRQIKCIIQHRYRVLSESQLVTIKDFKFLMLTIKS-RSAVQKKSVTAI |
| XP_006372523.1[Populus_trichocarpa]         | LEKIIQDFSDTSLSKSIKQIIHYKDLSPQLITFKDLLRFMLAIRS-CPCVWKKQSMTA    |
| XP_011038253.1[Populus_euphratica]          | LEKIIQDFSDTSLSKSIKQIIHYKDLSPQLITFKDFLRFMLAIRS-CPCVWKKQSMTA    |
| XP_012086460.1[Jatropha_curcas]             | LDKIIIEEFKDKVHQEMKQIISFYRNFSETPLITFKDLLRFMLIVKS-CPCAQKKRIDS   |
| XP_006494662.1[Citrus_sinensis]             | LDNIIQDFCGTDLCREMKQIFHNYRDISETLLLTLKDLLRFMLTVKS-CASAQKKTIMTT  |
| XP_006421081.1[Citrus_clementina]           | LDNIIQDFCGTDLCREMKQIFHHYRDMSETLLLTLKDLLRFMLTVKS-CASAQKKTIMTT  |
| XP_002533478.1[Ricinus_communis]            | LNKIIQDFSNTNEYKEMKQIMIDYYRNLSETQLITFRDLLRFMLTIKS-CPCAQKKRLAA  |
| XP_010108961.1[Morus_notabilis]             | LDRIIEDFNETEQAKEIKQIIRLYRDLSETQLITLNELLRFMLTVKS-RAVGKPIITASI  |
| XP_003616245.2[Medicago_truncatula]         | LDDIVRDLSKTKYHKDVKQMIIRFYRDMSETHIITIRELLRFMLTIKS-RRPVSKMTVTF  |
| OAP18009.1[Arabidopsis_thaliana]            | IDQIEFDGELRQSKEINQVFRYYREMSEGLKTFRDLLRFMLTIKS-HASPQKLLPVTP    |
| BAK05033.1[Hordeum_vulgare_subsp._vulgare]  | LCVLPHLS--CFSQELPLVVTKYQAISGHKLLNLGDLLRFMLELRT-----           |
| CDM85226.1[Triticum_aestivum]               | LALYSSHRS--PIRTPQNNTIALYWSLSDRQLVTVRDLFRFIMHLLHQARKDAE-----   |
| XP_008657002.1[Zea_mays]                    | LALYFSHRS--QIRTPQNNTIALYWALSNRQLVTLRDLFRFIMHLLHQGGK-----      |
| EAZ44935.1[Oryza_sativa_Japonica_Group]     | LCVLPHLS--CFSQELPMVVTKYQAISGHKLLSLGDLLRFMLELRA-----           |
| XP_002460302.1[Sorghum_bicolor]             | LCVLPHLS--CFSQDLVVVTKYQAISGHKLLNLGDLLRFMLELRT-----            |
| XP_003544360.1[Glycine_max]                 | LDMIVKDLSETKYKTEIQIIRCYRDMSETHIISLRDLLRFMLTVKSSRAPVPKITDTYS   |

```

XP_003578202.1[Brachypodium_distachyon] LCVLVPHLAC-CFGQELPMVVTKYQAI SGHKLLDLGDLLRFMLELRT-----
                                     *  *

XP_011652709.1[Cucumis_sativus] AKSP-----PPCRQSLQRNKQQSLVKE-KQIRYRKFATAISNMDSRWP
XP_007216520.1[Prunus_persica] SAFSSS-----TAKP--ATRAAHQIKPLMMKEKSVRYRKFTTVIAHMDSRWP
XP_008244388.1[Prunus_mume] SAFSSS-----TAKP--ATRAALQIKPLMK-EKSVRYRKFTTVIAHMDSRWP
XP_018505942.1[Pyrus_x_bretschneideri] AEVSSF-----IVKS--ATKATLQVKPSMK-EKSAKCRKFSTILAHMDSRWP
OAY60550.1[Manihot_esculenta] --TASP-----SISKYLTRVAS-QKKPLMK-EKCIRYRKFSVLGTLDSRWP
XP_008381356.1[Malus_domestica] AEVSSF-----IVKS--ATKATLQVKPSMK-EKSAKCRKFSTILAHMDSRWP
XP_018816590.1[Juglans_regia] P-----PTSNSKPSIRNKPLVK-EKSLKYRSFTALAN-MDSRWP
XP_002263205.1[Vitis_vinifera] DL--PA-----SSTLKPSTRRSLQNRPLK-DKTMKFKKFSTLITNMDSRWP
XP_004288593.1[Fragaria_vesca_subsp._vesca] AKPADV-----MEKARPATRESLKI KPPMK-EKSSKYRKFTVVSVMDSRWP
XP_017981172.1[Theobroma_cacao] TA--PS-----ASSQRNFIRISLPKKATSK-EKSSKCRKFTSVIAHMDSRWP
XP_006372523.1[Populus_trichocarpa] T-----TTSKPPINIVL-RRKPLIK-EKCMKYRNFSVLGTMDSRWP
XP_011038253.1[Populus_euphratica] T-----TTSKPPINIVL-RRKPLIK-EKCMKYRNFSVLGTMDSRWP
XP_012086460.1[Jatropha_curcas] -----NVKSSMVIAS-QKKPVVK-EKYTRYRKFSVLGTLDSRWS
XP_006494662.1[Citrus_sinensis] TK--PS-----K-----RMTLRNKSVVK-DKSVNYKRFSAVVAKMDSRWS
XP_006421081.1[Citrus_clementina] TK--PS-----K-----RMTLRIKSVVK-DKSVNYKRFSAVVAKMDSRWS
XP_002533478.1[Ricinus_communis] DATASS-----SAPKSTARVAALQKKPLVK-QKCTRYRKFSLLIGSLESRWP
XP_010108961.1[Morus_notabilis] SSSSSSLFSS-----ISKPFTRTGLLHQSTKPFMKDSKPVYKFKFSTVIANMDSRWP
XP_003616245.2[Medicago_truncatula] SPNAVSDTDSPCSTSAFMSRNASKPVLSSSRNFTMK-EKSARYKFKFSTAVANMDSRWP
OAP18009.1[Arabidopsis_thaliana] PLLTDS-----PHQKRSSRLLLKSDVADNDKSPKYRNYSTVAANLGSRWP
BAK05033.1[Hordeum_vulgare_subsp._vulgare] -----RLPATSVTAMDYRGIMSDASCRWS
CDM85226.1[Triticum_aestivum] -----MSKPAMDEHREVESNVLCMWT
XP_008657002.1[Zea_mays] -----MSKPSADKHKELTSNELCAWT
EAZ44935.1[Oryza_sativa_Japonica_Group] -----RLPATSVTAMDYRGIMSEASCRWS
XP_002460302.1[Sorghum_bicolor] -----RLPATSVTAMDYRGIMSEASCRWS
XP_003544360.1[Glycine_max] ---AASDSTS----SALTSRNSTKHTLPN-RSN-SMK-EKSVRYKFKFSSAVTNMDSRWP

```

XP\_003578202.1[Brachypodium\_distachyon] -----RLPATSVTAMDYRGIMSDASCRWS  
\*

XP\_011652709.1[Cucumis\_sativus] ARRLEYAAEVIVKALEEKK-----SDKFSHGGNGMTRQDVRDAARLHIGDTGLLDYVLKS  
 XP\_007216520.1[Prunus\_persica] QRRLEFAADVIVNALQEKK-----ERDFSHGG--MTRQDVRDARLHIGDTGLLDYVLKS  
 XP\_008244388.1[Prunus\_mume] QRRLEFAADVIVNALQEKK-----ERDFSHGG--MTRQDVRDAARLHIGDTGLLDYVLKS  
 XP\_018505942.1[Pyrus\_x\_bretschneideri] TRRLEFAADVIVNALQEKK-----ES--GHGG--MTRQDVRDAARLHIGDTGLLDYVLKS  
 OAY60550.1[Manihot\_esculenta] TRRLEYAAEVIVNTLKEKK-----ADKLSKGG--MSRQDVRDAARMHIGDTGLLDYVLKS  
 XP\_008381356.1[Malus\_domestica] TRRLEFAADVIVNTLQEKK-----ES--GHGG--MTRQDVRDAARLHIGDTGLLDYVLKS  
 XP\_018816590.1[Juglans\_regia] ARRLEYAAEVIVNALKVKK-----EGKFCHGG--MTRQDLRDAARLHIGDTGLLDYVLKS  
 XP\_002263205.1[Vitis\_vinifera] ARRLEYAADVIVNALREKRA----SECTH-DG--MTRQEVDAARMHIGDTGLLDYVLKS  
 XP\_004288593.1[Fragaria\_vesca\_subsp.\_vesca] AKRLEFAADVIVSALKEKK-----EKDFKNGG--MARQDVRDAARLHIGDTGLLDYVLKS  
 XP\_017981172.1[Theobroma\_cacao] AKRLEYAAEVIVDALKEHKS----EFCH--GG--MTRQDLRDAARMHIGDTGLLDYVLKS  
 XP\_006372523.1[Populus\_trichocarpa] TRRLQYAAEVIVDALKAKK-----EDKHSQEG--MTRQDVRDAARMHIGDTGLLDYVLKS  
 XP\_011038253.1[Populus\_euphratica] TRRLQYAAEVIVDALKAKK-----EDKHSQEG--MTRQDVRDAARMHIGDTGLLDYVLKS  
 XP\_012086460.1[Jatropha\_curcas] KKRLEYAAEVIVSALKEKR-----TDKFSQQG--MTRQDVRDAARMHIGDTGLLDYVLKS  
 XP\_006494662.1[Citrus\_sinensis] ARRLESAAEVIVNALQEQA----ENLGHGGG--MSRQKLDAARMHIGDTGLLDYVLKS  
 XP\_006421081.1[Citrus\_clementina] ARRLESAAEVIVNALQEQA----ENLGRGGG--MSRQKLDAARMHIGDTGLLDYVLKS  
 XP\_002533478.1[Ricinus\_communis] ARRLEYTAGVIVDALKAKKK----ADKYSHGG--MTRQDVRDAARMHIGDTGLLDYVLKS  
 XP\_010108961.1[Morus\_notabilis] PRRLEFAADVIVGALKEKK-----EDCFGNGG--MTRQDVRDAARLHIGDTGLLDYVLKS  
 XP\_003616245.2[Medicago\_truncatula] TRRLEFAAQVIVEALKEDK-----AMKPGSSG--MTRQDVRDAARLHIGDTGLLDYVLKS  
 OAP18009.1[Arabidopsis\_thaliana] VRRLIFAAEVIVESLKEK-----ALKQNG--MTRQDVRDSARLHIGDTGLLDYVLKS  
 BAK05033.1[Hordeum\_vulgare\_subsp.\_vulgare] AKRVDMAARAVVDALRRSE----AP----AARWVTRQEVDAARTYIGDTGLLDFVLKS  
 CDM85226.1[Triticum\_aestivum] NEDINRAEAAMLKVLRAVQ-----AGRWVSWRALRGAASKAVDSQELLDYSLRG  
 XP\_008657002.1[Zea\_mays] KEDLHRAEGAMLKVLQVVQ-----TGQWVSWRALRGAASKAVDSQELLDYSLRG  
 EAZ44935.1[Oryza\_sativa\_Japonica\_Group] AKRVDMAARAVVDALRRAEP-----AARWVTRQEVDAARAYIGDTGLLDFVLKS  
 XP\_002460302.1[Sorghum\_bicolor] AKRVDMAARAVVDALRRTEP-----PARWVTRQEVDAARAYIGDTGLLDFVLKS  
 XP\_003544360.1[Glycine\_max] TRRLEFAAQVIVDALKENK-----TVKLGSGG--MTRQDVRDAARLHIGDTGLLDYVLKS



|                                              |                                                                |
|----------------------------------------------|----------------------------------------------------------------|
| XP_003578202.1 [Brachypodium_distachyon]     | AKRVDMAARAVVDALRRPASASDRAPGMPAAPRWVTRQEV RDAARAYIGDTGLLDFVLKS  |
|                                              | * * * *                                                        |
| XP_011652709.1 [Cucumis_sativus]             | LNNVIVGN-QIVRRAVNPKTRILEYTIHEL R-----NGIQLTEEQ-----ESTENSE---- |
| XP_007216520.1 [Prunus_persica]              | LSNVIVGN-HIVCRAVNPTTRILEYTVHDL T---DGVKVSQPENE-----VLPQSLP---- |
| XP_008244388.1 [Prunus_mume]                 | LNNVIVGN-HIVCRAVNPTTRILEYTVHDL T---DGVKVSQPENE-----ILPQSLP---- |
| XP_018505942.1 [Pyrus_x_bretschneideri]      | MNNVIVGN-HIVCRAVNPATRILEYTVHDL A---DGVKVSEPGKE----IVAQSFQ----  |
| OAY60550.1 [Manihot_esculenta]               | MNNVIVGT-HVVRRAVNPTTKILEYSIDEL NGGVRPVRVTEPEAD----VVPEPLP----  |
| XP_008381356.1 [Malus_domestica]             | MNNVIVGN-HIVCRAVNPATRILEYTVHDL A---DGVKVSEPGKE----IVAQSFQ----  |
| XP_018816590.1 [Juglans_regia]               | MNNVVVGN-HIVCRTVNPTTRILEYSINEL G----NEAISEPEIE----LLPKPLP----  |
| XP_002263205.1 [Vitis_vinifera]              | MNNVIVGN-HVVCRAVNPATRVLEYTLKEL G---KGLVSELESE----MLPKPFP----   |
| XP_004288593.1 [Fragaria_vesca_subsp._vesca] | LNNVIVGN-QVVCRSVNPTTRILEYTVHDL D---DDDKVSEPEKE----ILPPPPQ----  |
| XP_017981172.1 [Theobroma_cacao]             | MNNVIVGC-HIVRRAIN-TSRILEYTIIDD ID---NGFKAPEAELE----IHHKPLPDA-- |
| XP_006372523.1 [Populus_trichocarpa]         | MNNVVVGK-YVVQRAVNPKTRILEYSIDE FGDGIIPVK-SEPES-----ETVP----     |
| XP_011038253.1 [Populus_euphratica]          | MNNVVVGK-YVVQRAVNPKTRILEYSIEE FGDGIIPVK-SEPES-----ETVP----     |
| XP_012086460.1 [Jatropha_curcas]             | MNNVIVGN-HVVHRAMNLETRILEYSIDE LD---NRKVKVTEPEEE----EVADPIP---- |
| XP_006494662.1 [Citrus_sinensis]             | MNNVIVGS-HIVHRAVNPATRILEYTIHDL C---DGAGISEPGPE----ISDEPLP----  |
| XP_006421081.1 [Citrus_clementina]           | MNNVIVGS-HIVHRAVNPATRILEYTIHDL C---DGAGISEPGPE----ISDEPLP----  |
| XP_002533478.1 [Ricinus_communis]            | MNNVIIGG-HVVRRAVNPKTKILEYSIDE LGKENRSAGLTEIEA----AVPEPLP----   |
| XP_010108961.1 [Morus_notabilis]             | LNNVIVGN-QIIRRAVNPATRILEYTIHEV G-----EKVSEEQEL----VSNIPSP----  |
| XP_003616245.2 [Medicago_truncatula]         | LNNVIVGN-YVVRRTVNSSSRILEYTIDEL R---KGHQAPEMEHG-VLTVADKPQVESST  |
| OAP18009.1 [Arabidopsis_thaliana]            | MNNVVVGD-VLVRRYVDPITRILHYTIQDL D---DAVKAKEPKKK-EAVVLEEITPLR--  |
| BAK05033.1 [Hordeum_vulgare_subsp._vulgare]  | LGNHIVGN-YVVRRAMNPVTKVLEYCLE DVS---SVLPASVGAGAGVPAGHGKMRVR--   |
| CDM85226.1 [Triticum_aestivum]               | LRGKLMDDGHFIAVRCNTETSAIEYRLE TYS---NQSPVDATVFG-----PS-----     |
| XP_008657002.1 [Zea_mays]                    | LGGKQLDNGLCAVRCNAGTSAIEYRLES S---VRSPANAAATFG-----PS-----      |
| EAZ44935.1 [Oryza_sativa_Japonica_Group]     | LGNHIVGN-YVVRRTMNPVTKVLEYCLE DVS---SVLPAVAAGGG--VPAQGKMRVR--   |
| XP_002460302.1 [Sorghum_bicolor]             | LGNHIVGN-YVVRRAMNPVTKVLEYCLE DVS---SVLPAVGGGG-----GKMRVR--     |
| XP_003544360.1 [Glycine_max]                 | LNNVIIGN-YVVRMNPSTRILEYTIHDLG ---KGSKAPEENKPEVMAHADQQVVES--    |

|                                              |                                                           |
|----------------------------------------------|-----------------------------------------------------------|
| XP_003578202.1 [Brachypodium_distachyon]     | LGNHIVGN-YVVRAMNPVTKVLEYKLEDVS----SVLLSHG-----GKMRVR--    |
|                                              | *                                                         |
| XP_011652709.1 [Cucumis_sativus]             | ----PTVTPGKDIYNDVLCIYRSIFLDYP-----ESEMVELATQGVLDISKH      |
| XP_007216520.1 [Prunus_persica]              | ---SASLVPGVDVYNDVLYLYEYHLLGYP-----ESELVELATRAILDTKH       |
| XP_008244388.1 [Prunus_mume]                 | ---SASLVPGVDVYNDVLYLYEYHLLGYP-----ESELVELATRAILDTKH       |
| XP_018505942.1 [Pyrus_x_bretschneideri]      | ---SATLFPQVDVYNDVLYLYEYHLLGYP-----ESELVDLATRAVLDAKH       |
| OAY60550.1 [Manihot_esculenta]               | ---VLPLIPGADLYGDMAYLYTKVLLNYP-----ESEVIELASQTVLDISKH      |
| XP_008381356.1 [Malus_domestica]             | ---SATLFPQVDVYNDVLYLYEYHLLGYP-----ESELVDLATRAVLDAKH       |
| XP_018816590.1 [Juglans_regia]               | ---ASTLVPGFDVHSDLVAVYKLNLLDYK-----KLNVELATQVVDISKH        |
| XP_002263205.1 [Vitis_vinifera]              | ---EQSIVPGADVNDVVIYLYRNVLLNYP-----DSELVELATRAVLDSKH       |
| XP_004288593.1 [Fragaria_vesca_subsp._vesca] | ---AAPVSGIDVYSDVLYLYEYHLLGYP-----ESGLVELATQAVLDISKH       |
| XP_017981172.1 [Theobroma_cacao]             | ---LPALVPGTDVYDDVVYLYNNVLLDYP-----ESEFLELATQAVLDISKH      |
| XP_006372523.1 [Populus_trichocarpa]         | ---AQPLLPGADVNDVVFVYENLVFNYP-----ESELVEVATQAILDSKH        |
| XP_011038253.1 [Populus_euphratica]          | ---AQPLLPGADVNDVVFVYENLVFNYP-----ESELVEVATQAILDSKH        |
| XP_012086460.1 [Jatropha_curcas]             | ---VPSLVPGADLYGDMGYLYMKVLMNYP-----ESELVETATQAILDSKH       |
| XP_006494662.1 [Citrus_sinensis]             | ---PLALETGSDVYSEVVYLYMNVLLNYP-----ESELVALATQAVLDISKH      |
| XP_006421081.1 [Citrus_clementina]           | ---PLALETGSDVYSEVVYLYMNVLLNYP-----ESELVALATQAVLDISKH      |
| XP_002533478.1 [Ricinus_communis]            | ---AAP-VPGADLYADLGYYLYKVVLLNYP-----ESELAEELATQTILDSKH     |
| XP_010108961.1 [Morus_notabilis]             | ---ARIVPGVDVYNDVLFYLYKHLMEYP-----DSEFVDLATQTILDTKH        |
| XP_003616245.2 [Medicago_truncatula]         | LSSSSSSVPGNDVYSDVVYLYKNVLLGYP-----DSEAVELAVQTILDCRH       |
| OAP18009.1 [Arabidopsis_thaliana]            | --ILTPLKPGADVGDLLLLYTNVLLNYP-----ESELVRSATQAILDSKH        |
| BAK05033.1 [Hordeum_vulgare_subsp._vulgare]  | ----FHLTRAQLMRDLVHLYRHVLEKEP-----SQALTTGAFGAIPVAVRMILDIKH |
| CDM85226.1 [Triticum_aestivum]               | ---VEHLAHLRFLYDALLNPEIMLSSQP-----EVVGASAHNAAARILDCKQ      |
| XP_008657002.1 [Zea_mays]                    | ---VDQLLHDLRFLYDALLNPESMLSSQP-----EVVGASAHSAAKIIDCKQ      |
| EAZ44935.1 [Oryza_sativa_Japonica_Group]     | ----FQLTRAQLMRDLVHLYRHVLEKEP-----SQALTGGAFGAIPVAVRMVLDIKH |
| XP_002460302.1 [Sorghum_bicolor]             | ----FQLTRAQLMRDLTHLYRHVLEKEP-----SQALTTGAFGAIPVAARMVLDTKH |
| XP_003544360.1 [Glycine_max]                 | ----SWMLGNDVYSDFLYLYKNVLLGYP-----DSEAVDTAVQTILDSRY        |

|                                             |                                                                     |
|---------------------------------------------|---------------------------------------------------------------------|
| XP_003578202.1[Brachypodium_distachyon]     | -----FHLTRAQLMRDLVHLYRHVLKEPPTQLPLTASAGSGAAAFGAIPVAVRRVLDVKH<br>* * |
| XP_011652709.1[Cucumis_sativus]             | FAKEWPLQDEE-EHLLT----FI IKLMPRLTFHTDLELKSD-FMPSGEVVVLPLHTTIG        |
| XP_007216520.1[Prunus_persica]              | FVKECSFRDEE-EQLLT----FICQLLPSLMDMDIEFKRE----LPPGEIVVMPLHATIG        |
| XP_008244388.1[Prunus_mume]                 | FVKECSFRDEE-EQLLT----FICQLLPSLMDMDIEFKRE----LPPGEIVVMALHATIG        |
| XP_018505942.1[Pyrus_x_bretschneideri]      | FVKECPFRDDE-EQWLT----FFCQLLPSSTDKEIEFKRG----MPPGEVVVMPLHATIG        |
| OAY60550.1[Manihot_esculenta]               | FVKEWPFDEE-DQLLR----FICQVMPNMIDLEANFNRE----LPPGEIVVLPLHATVA         |
| XP_008381356.1[Malus_domestica]             | FVKECPFRDDE-EQWLT----FFCQLLPSSTDKEIEFKRG----LPPGEVVVMPLHATIG        |
| XP_018816590.1[Juglans_regia]               | FVKEWPFDEA-DQYLR----FICRLLPSFYDIETELNGK----FPPGEIVVVPLHATVG         |
| XP_002263205.1[Vitis_vinifera]              | FVKEWPFSDDED-DQLLR----FVCHMPSLSELE-IFTRE----LPPGEFIVVPPYATVG        |
| XP_004288593.1[Fragaria_vesca_subsp._vesca] | FVKECSVRDDT-EKLLT----LFCQILPSFTDKEIDFKRD----LPPGEIVVMPLNATVG        |
| XP_017981172.1[Theobroma_cacao]             | FVKERPFRDED-DQLLR----FFCQVMPNLFGAENILTKK----SPAGELVTVPLHATVL        |
| XP_006372523.1[Populus_trichocarpa]         | FVKEWPFVRVEN-DQLLS----FICQVMPTWNDLEAKFHRK----APPGEIIVLPLHASVL       |
| XP_011038253.1[Populus_euphratica]          | FVKEWPFVRVEN-DQLLS----FICQVMPTWNDLEAKFHRK----APPGEIIVLPLHASVL       |
| XP_012086460.1[Jatropha_curcas]             | FVKEWPFENEE-DQLLR----YICQVMPNIEAGTKFTRE----LPPGEIIMLPLHATVA         |
| XP_006494662.1[Citrus_sinensis]             | FVKEWPFRDED-DQFLR----FKCQVMPSFVDSETDLTAK----LPPGELVMIPLHSTVL        |
| XP_006421081.1[Citrus_clementina]           | FVKEWPFRDED-DQFLR----FKCQVMPSFVDSETDLTGK----LPPGELVMIPLHSTVL        |
| XP_002533478.1[Ricinus_communis]            | FVKVWPFKDEE-DELLR----FICQVMPNIIHLEVELKKE----LPPGEIVVLPLHSTVA        |
| XP_010108961.1[Morus_notabilis]             | LVKEWPFRDEE-DQLLT----FVCRLLP-R-SFGDG-----IAEIVRVPLHATIS             |
| XP_003616245.2[Medicago_truncatula]         | FVKEWKLDEM-EQVLT----FICHLKPNFVENKSDLKGP-----SCGEIVTVPLHATVR         |
| OAP18009.1[Arabidopsis_thaliana]            | FIKEWPIWDNN-DTVLQ----FLCRINPSLVDVRSEQTTE----LPPGELVTVPLQATVY        |
| BAK05033.1[Hordeum_vulgare_subsp._vulgare]  | FVKDYHEGMTGTN-----SGVGVHVVYISLCCTLIVRNGSSE-LVPPYETVTVPAHATVG        |
| CDM85226.1[Triticum_aestivum]               | FIKHYDESAPESPPNP-----ILLAVRCSIELLDHPKDYT----APPVELVLLPATATLG        |
| XP_008657002.1[Zea_mays]                    | FIKHYDEHALRTPSNP-----FLLCVRCSIELLDHPKDYT----TPPEELVLLPASATLG        |
| EAZ44935.1[Oryza_sativa_Japonica_Group]     | FVKDYHEGQAAASS---NGGGFGPHINLCCTLVSNGSPE-LAPPYETVTLPAHATVG           |
| XP_002460302.1[Sorghum_bicolor]             | FVKDYHEGFAPINS---VGAG---HVHMLNCCTLVVRNGSPELVAPPYETVTLPAHATVG        |
| XP_003544360.1[Glycine_max]                 | FVKEWVVRDEMKEQVLT----FICRLQPNFVDKHELKGL-----ACGEVVVVPLHATVG         |

|                                             |                                                                     |
|---------------------------------------------|---------------------------------------------------------------------|
| XP_003578202.1[Brachypodium_distachyon]     | LVKDYHEAIMAAATANNSVGGIVGHVYVNMCCTLVVRDGSPE-LVPPYETVTVPAHATVG<br>* * |
| XP_011652709.1[Cucumis_sativus]             | EVKEAAEKALRDITYVTEQFEVLAIENLENYE--DREVI FGAVESGAELFVKGMGIDLD-       |
| XP_007216520.1[Prunus_persica]              | ELKLAETALRDITYCITERFVVKGIEGLDEME--DMEVLFGVVQSGAEVGVVGTGIDLD-        |
| XP_008244388.1[Prunus_mume]                 | ELKLAETALRDITYCITERFVVKGIEGLDEMD--DMEVLFGVVQSGAEVGVVGTGIDLD-        |
| XP_018505942.1[Pyrus_x_bretschneideri]      | ELKRAAESALRDITYCITEQFVVMGIEGLEEMD--DMEVLFGVAESGAEVGVVSGIDLD-        |
| OAY60550.1[Manihot_esculenta]               | ELKQAATSALRDSYCI LEKFVVT EIERMEELD--DWELLFGAVESGADLFMRGDGMDLN-      |
| XP_008381356.1[Malus_domestica]             | ELKRAAESALRDITYCITERFVVMGIEGLDEMD--DMEVLFGVAESGAEVGVVSGIDLD-        |
| XP_018816590.1[Juglans_regia]               | ELKQAVENALRDITYCITEGFLVIEIKELEELE--DGEVLFGAVESGVVLCVVRGIDLE-        |
| XP_002263205.1[Vitis_vinifera]              | ELKETVERTLRDITYCIMEQVVVTEIEDMEGMT--DEEVLFGTIESGSEVWVRGTGMDLE-       |
| XP_004288593.1[Fragaria_vesca_subsp._vesca] | ELKQEAENALRDITYCITEQFVVT EIKGLEESD--DMDVLAGTVQSGTEVGVVSGIDLD-       |
| XP_017981172.1[Theobroma_cacao]             | DLKQAVEKALRDITYCIMDKLVVTDIVDLGEMD--DKDVLFGALES GAKILVSGSGIDLD-      |
| XP_006372523.1[Populus_trichocarpa]         | ELKQEAESALRDITYCMLERFVVI EIEHMENLD--DKDLLCKFVESGAEIFVKGYGMDIN-      |
| XP_011038253.1[Populus_euphratica]          | ELKQEAESALRDITYCMLSFVVI EIEHMENLD--DKDLLCKFVKSGAEIFVKGYGMDIN-       |
| XP_012086460.1[Jatropha_curcas]             | ELKRAAENALKDTYYILENFVVT EIELMEELE--DWEVLFGVVESGSELFMKNGVDLN-        |
| XP_006494662.1[Citrus_sinensis]             | ELKEAAESALRDITYCIMENLGVTDVNNMQKLD--DGELLFGAVESGSQVWIQGYGIDSD-       |
| XP_006421081.1[Citrus_clementina]           | ELKEAAESALRDITYCIMENLVVTDVGNMQKLD--DGELLFGAVESGSQVWIQGYGIDSD-       |
| XP_002533478.1[Ricinus_communis]            | ELKQAAENALRDITYCIMENFEVTEINQMEELM--DEELLFGSVESGAELFMRNGMDLN-        |
| XP_010108961.1[Morus_notabilis]             | DLKEAVECALRDITYCVTEEIEVVEIDGLEEVE--DEEVLFGRVESGTEIRVRGVVDTE-        |
| XP_003616245.2[Medicago_truncatula]         | DLKQTAEALRDITYCIAERLIVTDIKELMDVE--DEEVI FGQIESGVKLSVRGIGIDLC-       |
| OAP18009.1[Arabidopsis_thaliana]            | DLKQAI EETFRDITYCILSNFVVT EIDEVEED-----MSLIGSCSALTVRGHGIDLE-        |
| BAK05033.1[Hordeum_vulgare_subsp._vulgare]  | ELKWEVQR LFRDMYGLRTFTAECVVGIGAG--LDASPALGLIGVSTVVVEGVVGEQQE         |
| CDM85226.1[Triticum_aestivum]               | ELKMLAARVFQETYLMFHSFQAEQLPEFPNLS--DTPVKHVLGPSQLVVRVGRCTGDHR         |
| XP_008657002.1[Zea_mays]                    | DLKVQASKAFQETYLMFQSFQTEQLPDFPNFS--DTPVKHVLGSGQLLRVGRCTGDYR          |
| EAZ44935.1[Oryza_sativa_Japonica_Group]     | ELKWEAQRVFSEMYLGLRFSFAADSVVGVGAD--QEGLPVLGLVDVGSVAVVQGSVGEQIN       |
| XP_002460302.1[Sorghum_bicolor]             | ELKWEVQR LFRMYLGLRTFTAESVAGVGVV--KDACPVLGLIDVGSVAVVIEGTVVEQQQ       |
| XP_003544360.1[Glycine_max]                 | DLKRAEAALRDITYCIAERLIVTDIKELMDVS--DEEVLFGLIQSGVELCVRGIAIDLL-        |

```

XP_003578202.1[Brachypodium_distachyon] ELKWEVQRLFRDMYLALRTFTAESVVGIGIGPQQEASPVLGLIGVGSTVVVEGVVGSLLQ
* * *

XP_011652709.1[Cucumis_sativus] -----TPLKYQGGV---GTWKVRCVCGTGDDDDGERMVACDICEVWQHTRCCGID
XP_007216520.1[Prunus_persica] -----TPLRYEGGS---DTWMVRCECGARDDDGERMVACDICEVWQHTRCCGIE
XP_008244388.1[Prunus_mume] -----TPLRYEGGS---DTWMVRCECGARDDDGERMVSCDICEVWQHTRCCGIE
XP_018505942.1[Pyrus_x_bretschneideri] -----TPLRYEGGS---DTWMVRCECGARDDDGERMVACDICEVWQHTRCCGIE
OAY60550.1[Manihot_esculenta] -----TELRYEGGP---DNWKVRCCEGAQDDDDGERMVACDICEVWQHTRCNGIE
XP_008381356.1[Malus_domestica] -----TPLRYEGGS---DTWMVRCECGARDDDGERMVACDICEVWQHTRCCGIE
XP_018816590.1[Juglans_regia] -----NRLRYQSGA---DTWMVRCECGARDDDGERMVACDLCEVWQHTRCCGIE
XP_002263205.1[Vitis_vinifera] -----AELKYEGGS---DNWRVSCCEGALDDDGERMVACDICEVWQHTVCSGID
XP_004288593.1[Fragaria_vesca_subsp._vesca] -----TPLRYQGGG---DTWMVRCECGATDDDGERMVACDICEVWQHTRCCGME
XP_017981172.1[Theobroma_cacao] -----SNLRHEGGA---DNWIVRCECGAQDDDDGERMVSCDICEVWQHTRCCGIE
XP_006372523.1[Populus_trichocarpa] -----SQLRYEGGS---DNWKVRCCEGACDDDDGERMVECDICEVWQHTRCNGID
XP_011038253.1[Populus_euphratica] -----SQLRYEGGS---DNWKVRCCEGACDDDDGERMVECDICEVWQHTRCNGID
XP_012086460.1[Jatropha_curcas] -----TELRYEAGP---DNWKVRCCEGAQDDDDGERMVACDICEVWEHTRCNGID
XP_006494662.1[Citrus_sinensis] -----SKLRYEGGN---DKWIVKCECGAQDDDDGERMVACDICEVWQHTRCHGIE
XP_006421081.1[Citrus_clementina] -----SKLRYEGGN---DKWIVKCECGAQDDDDGERMVACDICEVWQHTRCLGIE
XP_002533478.1[Ricinus_communis] -----TELRYESGP---DNWKVRCCEGAEDDDGERMVACDICEVWQHTRCNGIE
XP_010108961.1[Morus_notabilis] -----GPLMHQGGC---DPWKVVCECGARDDDGERMVACDICEVWQHTRCCGIE
XP_003616245.2[Medicago_truncatula] -----TPLKYQGGG---DNWKVRCCEGAQDDDDGERMVACDICEVWQHTRCCGID
OAP18009.1[Arabidopsis_thaliana] -----SKLKCQGGC---DTWMVKCIICRARDDDGERMISCDVCEVWQHTRCCGID
BAK05033.1[Hordeum_vulgare_subsp._vulgare] PAEEGD-QRKKAAAVCEGGGDV--GERVVDVCVGAADDDGERMACDICEAWQHTRCAGVA
CDM85226.1[Triticum_aestivum] -----RIVQFRMERGL---ENWTVDCITCGAKDDDDGERMMACDAGVWQHTRCSGIS
XP_008657002.1[Zea_mays] -----RIVQFRMERGL---ENWTVDCSCGAKDDDDGERMLACDICGVWQHTRCSGIS
EAZ44935.1[Oryza_sativa_Japonica_Group] GEDHERKEEAAAAAVCEGSGG--GERVVDACAGAVDDDDGERMACDICEAWQHTRCAGIA
XP_002460302.1[Sorghum_bicolor] LADEGVQPGNEAAAVSEGGGD--SERIVDCACGADDEDGERMACDICEAWQHTRCAGIK
XP_003544360.1[Glycine_max] -----TPLKYQGESESADNWKVRCCEGAQDDDDGERMVACDICEVWQHTRCYGID

```

```

XP_003578202.1[Brachypodium_distachyon]  AEEEEESDEQRNGAVCEGSD---GERVVDCACGADDDDDGERMACCDICEAWQHTRCAGVA
                                         * * * * *
XP_011652709.1[Cucumis_sativus]         DADNVPLLFVCAACCDLGLQ--KI-----
XP_007216520.1[Prunus_persica]          DADTVPPLFVCSACCVSLVPP--KFEP-CDR-TLFCLSLIFWTVRNGGSESLAFLENAT
XP_008244388.1[Prunus_mume]             DADTVPPLFVCSACCVSLVPP--KFEP-CLR-FDCSDAFSIFCTH-----
XP_018505942.1[Pyrus_x_bretschneideri]  DADTVPPLFVCSACCVSLVPP--RIEP-CLR-FDCSDAFSICCRH-----
OAY60550.1[Manihot_esculenta]           DSGTVPPLFVICAGCCDSLGH--RGES-QEE-LENSDILLMIP-----ATEYVAQFLE-
XP_008381356.1[Malus_domestica]         DADTVPPLFVCSACCVSLVPP--RIEP-CLR-FDCSDAFSICCRH-----
XP_018816590.1[Juglans_regia]          DTEAVPPLFVCSGCCVSLGTL--KTEA-SCA-FECSDTLLMST-----DTFGLELGY-
XP_002263205.1[Vitis_vinifera]         DSETVPPLFVCPKCCALLVPA--RSES-SD-----CGRVQLAP-----VYQFGMELLY-
XP_004288593.1[Fragaria_vesca_subsp._vesca] DAEVPRFLFICSTCYVSLVPP--KTEPAALR-FDCSTAFLEWRH-----
XP_017981172.1[Theobroma_cacao]        DSEAVPPLFVCPGCCASLGP--MSES-PLT-YQSSDILLDS-----ETVYGM--LEY
XP_006372523.1[Populus_trichocarpa]     DADTVPQLFVICSGCCDSSLPG--KTET-HQR-FESSDILLMIPAAIG-YGAEAAEPFYE-
XP_011038253.1[Populus_euphratica]     DADTVPQLFVICSGCCDSSLPG--KTET-HQR-FESSDILLMIPAAIG-YGAEAAEPFYQA
XP_012086460.1[Jatropha_curcas]        DSKTVPPLFICTECCNSVVKP--TNEL-QVE-FENSDDLMLVP-----PNAYVAELVK-
XP_006494662.1[Citrus_sinensis]        DSGTVPPLFVCPRCCSSFAPS--RTES-SFR-FLGSDILLVP-----ETEYGAERVVF
XP_006421081.1[Citrus_clementina]     DSGTVPPLFVCPRCCSSFAPS--RTES-SF-----
XP_002533478.1[Ricinus_communis]       DSEAVPPLFVCTRCCDSMIKS--RKKV-KVE-IGNSEDLLMIPAIFQDFANDGIGMLL--
XP_010108961.1[Morus_notabilis]        DAETVPPLFVCSACCDLVLPL--RANHEPSP-DALSDDLTP-----QVDYSLAIGY-
XP_003616245.2[Medicago_truncatula]   DSETVPPLFVCSGCCDSLMP--RIESSSFGMVDCADSFVLSPE-----PTHLLEYGY-
OAP18009.1[Arabidopsis_thaliana]       DSDTLPLFVCSNCCFEAEQ--RKVLQPKYEFPSSENVFLLESADDFGDRCLGMIFP
BAK05033.1[Hordeum_vulgare_subsp._vulgare] DTEDVPHVFLCSRCDNDVASFPALNC-----
CDM85226.1[Triticum_aestivum]         DFEEVPEKFCRKCASPRKGGKGGGGGGGGGGRMEMASAGRCKDEIGSSVGGAGKIGRL
XP_008657002.1[Zea_mays]              DFEEVPEKFCRKCASPRKGDG--RGGGGSNGGGTMEVTASGRCKDEIGASVGGAGKYGRM
EAZ44935.1[Oryza_sativa_Japonica_Group] DTEDAPHVFLCSRCDNDVVSFPFNC-----
XP_002460302.1[Sorghum_bicolor]       DTDDAPHVFLCSRCDNDVLSFPPLSC-----
XP_003544360.1[Glycine_max]           DSETVPPLFVCTGCCDVLVPSRTEAFAFG--VDSVDSFLISED-----PTTLLEDYEG

```

|                                             |                                 |
|---------------------------------------------|---------------------------------|
| XP_003578202.1[Brachypodium_distachyon]     | DADDVPHVFLCSRCDNDVLSFPSFNC----- |
|                                             | * * * * *                       |
| XP_011652709.1[Cucumis_sativus]             | -----                           |
| XP_007216520.1[Prunus_persica]              | T-----                          |
| XP_008244388.1[Prunus_mume]                 | -----                           |
| XP_018505942.1[Pyrus_x_bretschneideri]      | -----                           |
| OAY60550.1[Manihot_esculenta]               | -----                           |
| XP_008381356.1[Malus_domestica]             | -----                           |
| XP_018816590.1[Juglans_regia]               | -----                           |
| XP_002263205.1[Vitis_vinifera]              | -----                           |
| XP_004288593.1[Fragaria_vesca_subsp._vesca] | -----                           |
| XP_017981172.1[Theobroma_cacao]             | DNCIRILP                        |
| XP_006372523.1[Populus_trichocarpa]         | -----                           |
| XP_011038253.1[Populus_euphratica]          | -----                           |
| XP_012086460.1[Jatropha_curcas]             | -----                           |
| XP_006494662.1[Citrus_sinensis]             | NDDIGMSL                        |
| XP_006421081.1[Citrus_clementina]           | -----                           |
| XP_002533478.1[Ricinus_communis]            | -----                           |
| XP_010108961.1[Morus_notabilis]             | -----                           |
| XP_003616245.2[Medicago_truncatula]         | -----                           |
| OAP18009.1[Arabidopsis_thaliana]            | EENYLL--                        |
| BAK05033.1[Hordeum_vulgare_subsp._vulgare]  | -----                           |
| CDM85226.1[Triticum_aestivum]               | ATVG----                        |
| XP_008657002.1[Zea_mays]                    | ATVG----                        |
| EAZ44935.1[Oryza_sativa_Japonica_Group]     | -----                           |
| XP_002460302.1[Sorghum_bicolor]             | -----                           |
| XP_003544360.1[Glycine_max]                 | Y-----                          |

XP\_003578202.1[Brachypodium\_distachyon]

-----
