# Supplementary material for: Fine mapping of a male sterility gene ms-3 in a novel cucumber (Cucumis sativus L.) mutant
Source: PubMed Central journal article supplement (PMC5787221; doi:10.1007/s00122-017-3013-2), 2017-11-13
Supplement: 122_2017_3013_MOESM5_ESM.pdf [file 122_2017_3013_MOESM5_ESM.pdf]

Fig S5. Protein sequence alignment of cucumber Csa3M006660 and *Arabidopsis thaliana* MMD1. The sequences shared 48.96% identity. (Black= Conserved region; Yellow highlight=PHD domain; Red highlight=SNP loci)

|             |                                                                                                                             |
|-------------|-----------------------------------------------------------------------------------------------------------------------------|
| MMD1        | MPVPTIETCRKRRKPKVYNLQRFGEDGFPIQRNGAFRDQIRVFLRDCAEIEDYDIRGNTVWCTLLSHETKSSLIPLYIVEENVKHSSEPYCDHCRCTGWS                        |
| Csa3M006660 | MSISILESCCKRKRKPKLFGFTFGDPCSPINPTGPFRENIRIFLQCCAEIEDYRIQEMPIWCTLVHENKSFVVPVLYTIEEDVKLSPKPYCDQCRCGWS                         |
|             | * * * * * * * * * * * * * * * * * * * * * * * * * * * * * * * * * * * * * * * * * * * * * * * * * * * * * * * * * * * * * * |
| MMD1        | NHFVSKRKYHFITPIDTEWSLPLEDDAFD--SQSHVLHGLIHCNGFGHLVCVNGMESGSKYLCGREIVDFWDRLCNSLGARMITVEDLAKRKSVELRLLYG                       |
| Csa3M006660 | NHFVSKRKYHIIVPLDDRWNKRLDDGGFDLDDQTHLLHGLIHCNGFGHLVCVNGIEGSKFLCGREVMDLWDRICTNLRTRKITVEDLSKRSMDRLRLHIG                        |
|             | ***** * * * * * * * * * * * * * * * * * * * * * * * * * * * * * * * * * * * * * * * * * * * * * * * * * * * * * * *         |
| MMD1        | VAYGHSWFGRWGYPKFCGSGFVTKNEYENAIIEALGSLEIDQIEFDGELRQSKEINQVFRYYREMSEGHDKTFRDLLRFMLIKSHASPKLLPVTPLLTP                         |
| Csa3M006660 | VAYGHPWFGRWYRFRGSGFVKEHHYSRALEILSLELDKIMHEVDYSDRGREVVKQIRHYRNLSETQLITLKDLLKFMLTVK--YVSAIEKKTVP--IA                          |
|             | ***** ***** * * * * * * * * * * * * * * * * * * * * * * * * * * * * * * * * * * * * * * * * * * * * * * *                   |
| MMD1        | DSPHQKRSSLRLKSDVADNDKSPKYRNYSTVAANLGSRWVRRILFAAEVIVESLKEMKALKQ----NGMTRQDVRDSARLHIGDTGLLDYVLKSMN                            |
| Csa3M006660 | KSPPCRQS-LQRNKQSLVKEKQIRYRFATAISNMSRWPARREYAAEVIVKALEEKSDKFSHGGNGMTRQDVRDAARLHIGDTGLLDYVLKSLNN                              |
|             | * * * * * * * * * * * * * * * * * * * * * * * * * * * * * * * * * * * * * * * * * * * * * * * * * * * * * * * *             |
| MMD1        | VVDVLRVRYDPTTRILHYTQQDLDVAKAKEPKKEAVVLEETTPLRILTPKPGADVYGDLLLYTNVLLNYPESELVRSATQAILDSKHFIKEWPIW                             |
| Csa3M006660 | IVGNQIVRRVNPKTIRILEYTHLRNGIQLTE--EQESTENSEPT-----VTPGKDIYNDVLCIYRSIFLDYPESEMVELATQGVLDKHFVAKEWPLQ                           |
|             | * * * * * * * * * * * * * * * * * * * * * * * * * * * * * * * * * * * * * * * * * * * * * * * * * * * * * * * *             |
| MMD1        | DNNDTVLQFLCRINPSLVDVRS---QTTELPPGELVTVPLQATVYDLKQAIBETFRDTCILSNFVVTEIDEVE--EDMSLIG----SCSALTIV                              |
| Csa3M006660 | DEEHLITFI IKLMPRLTFTHTDLELKSDFMPSGEVVLPLHTTI GEVKAAEKALRDTYVVEQFEVLAIENLENYEDREVIFGAVESGABLFV                               |
|             | * * * * * * * * * * * * * * * * * * * * * * * * * * * * * * * * * * * * * * * * * * * * * * * * * * * * * * * *             |
| MMD1        | RGHGIDLESKLCQGGCDTVMVKICRARRDDGGERMISCVDVCEVWQHTRCCGIDDSDTLPPFLVCSNCC EEF AEQQRKVLQPKYEFPSSENVFLE                           |

Csa3M006660

KGMGIDLDTPKYGQGGVGTWVRCECGTGDDDDGERMVACDI CEI WQHTRCCGIDDADNVPLLFVCAACCDSLGQLK-----

\* \*\*\* \* \* \* \* \* \* \* \* \* \* \* \* \* \* \* \* \* \* \* \* \* \* \* \* \* \* \* \* \* \* \* \* \* \* \* \* \*

MMD1

SADDFFGDQRCLGMIFPEENYLL

Csa3M006660

-----
