# Supplementary material for: Fine mapping of a male sterility gene ms-3 in a novel cucumber (Cucumis sativus L.) mutant
Source: PubMed Central journal article supplement (PMC5787221; doi:10.1007/s00122-017-3013-2), 2017-11-13
Supplement: 122_2017_3013_MOESM6_ESM.pdf [file 122_2017_3013_MOESM6_ESM.pdf]

Table S1. Gene primers designed for KASPar

| Marker names | SNP position | Allele X | Allele Y | Primer Allele X (5'-3')                         | Primer Allele Y (5'-3')                         | Primer Common (3'-5')                                                                                                      |
|--------------|--------------|----------|----------|-------------------------------------------------|-------------------------------------------------|----------------------------------------------------------------------------------------------------------------------------|
| C304430G     | 304430       | C        | G        | AATTACATGAATAAGTGTTTCG<br>TAATTTTCG             | AATTACATGAATAAGTGTTTCG<br>TAATTTCC              | AAACTTCAAGTTTA<br>GGATAGAATCGGT<br>TTGA                                                                                    |
| G564531C     | 564531       | G        | C        | GGTTTGGAATCTTGCTTGGCAT<br>TG                    | GGTTTGGAATCTTGCTTGGCAT<br>TC                    | CAATCAACCATATT<br>CAGTTTAATCAACT<br>AAACAAA                                                                                |
| A701466G     | 701466       | A        | G        | ATCTAGAAACCAAATAAAAAAC<br>TATAGCCAA             | ATCTAGAAACCAAATAAAAAAC<br>TATAGCCAA             | AATTTAGTTTCAAA<br>ATTTGTTTATTAAT<br>AAAAATATACATCT<br>CT                                                                   |
| G729940C     | 729940       | G        | C        | GGAACCCCTTCTGAAGCTGTG<br>GGAACCCCTTCTGAAGCTGTC  | GGAACCCCTTCTGAAGCTGTG<br>GGAACCCCTTCTGAAGCTGTC  | GTAGCTATAAGAA<br>AGGGCAGAGACC<br>TCCAATCACCCTT<br>CCTACAATTTATCG                                                           |
| T785141C     | 785141       | T        | C        | GGTCACGCAGATGGGTATTGG<br>GCCATTTCTAAGTTCATGAATC | GGTCACGCAGATGGGTATTGG<br>GCCATTTCTAAGTTCATGAATC | GTAGTTCCGCGTGCA<br>GTGAATCCTAA<br>TGTC                                                                                     |
| A806246C     | 806246       | A        | C        | CCATTTCTAAGTTCATGAATCG<br>TGTC                  | CCATTTCTAAGTTCATGAATCG<br>TGTC                  | TTTCAAAATCATTTCAAACTTA<br>TAAATTAAGAGAC<br>CTGATAACTA<br>TGAATTTATTACTT<br>TCAAATCATTTCAAACTTACT<br>AACCAAATAC<br>GATAACTC |
| T861262G     | 861262       | T        | G        | TACGTGAATATTTTCTTTTTCT<br>TTATACGTAT            | TACGTGAATATTTTCTTTTTCT<br>TTATACGTAT            | ATTTAGAAAACAC<br>ACGTATCAAAATTA<br>ACTTAGC                                                                                 |
| T1031386G    | 1031386      | T        | G        | CGTGAATATTTTCTTTTTCTTT<br>ATACGTAG              | CGTGAATATTTTCTTTTTCTTT<br>ATACGTAG              | AAGACTAATATGCCCTTCCTCT<br>ATTCCAAGTTGGGA<br>TCTA<br>TTGAATGGAAATG                                                          |
| T1101289C    | 1101289      | T        | C        | GACTAATATGCCCTTCCTCTTC<br>TG                    | GACTAATATGCCCTTCCTCTTC<br>TG                    | TATGTACAGCATCAACAAGTG<br>ATCATCTGTCTCCA<br>TGCA<br>ATTCACTTGAAAAC                                                          |
| T1508343G    | 1508343      | T        | G        | TGTACAGCATCAACAAGTGTG<br>CC                     | TGTACAGCATCAACAAGTGTG<br>CC                     | TTT<br>TTCGAACATATACAAAAGTAG<br>GTGATTCATTGAGA<br>ATATATCAAAA<br>ATATCTATTTAATT                                            |
| A2179014C    | 2179014      | A        | C        | CGAACATATACAAAAGTAGAT<br>ATATCAAAC              | CGAACATATACAAAAGTAGAT<br>ATATCAAAC              | GTACTTG                                                                                                                    |
