# Supplementary material for: Fine mapping of a male sterility gene ms-3 in a novel cucumber (Cucumis sativus L.) mutant
Source: PubMed Central journal article supplement (PMC5787221; doi:10.1007/s00122-017-3013-2), 2017-11-13
Supplement: 122_2017_3013_MOESM7_ESM.pdf [file 122_2017_3013_MOESM7_ESM.pdf]

Table S2. Putative genes in the 76 kb region of cucumber chromosome 3 predicted to contain *Ms-3*

| Genes       | Position           | Predicted function                                   |
|-------------|--------------------|------------------------------------------------------|
| Csa3M006630 | Chr3:782240-786910 | COBW domain-containing protein 2-like                |
| Csa3M006640 | Chr3:787921-798914 | DNA (cytosine-5)-methyltransferase CMT2-like         |
| Csa3M006650 | Chr3:802042-805053 | PHD finger protein MALE MEIOCYTE DEATH 1-like        |
| Csa3M006660 | Chr3:805509-807682 | PHD finger protein MALE MEIOCYTE DEATH 1-like        |
| Csa3M006670 | Chr3:814253-819247 | uncharacterized LOC101207845                         |
| Csa3M006680 | Chr3:820895-825452 | protein LTV1 homolog                                 |
| Csa3M006690 | Chr3:826762-830720 | phosphoribulokinase, chloroplastic-like              |
| Csa3M006700 | Chr3:831598-836257 | secretory carrier-associated membrane protein 4-like |
| Csa3M006710 | Chr3:838820-841281 | uncharacterized LOC101208810                         |
| Csa3M006720 | Chr3:844556-849288 | 26S proteasome non-ATPase regulatory subunit 13-like |
| Csa3M006730 | Chr3:848589-855285 | uncharacterized LOC101207353                         |
